# Supplementary material
Source: PubMed Central journal article supplement (PMC4272586)
Supplement: JB.02364-14_zjb999093452so1.pdf [file JB.02364-14_zjb999093452so1.pdf]

**Table S1. Bacterial strains and plasmids used in this study**

| <b>Strains</b>                 | <b>Designation in this study</b> | <b>Description</b>                                                                               | <b>Source</b> |
|--------------------------------|----------------------------------|--------------------------------------------------------------------------------------------------|---------------|
| <i>B. anthracis</i>            |                                  |                                                                                                  |               |
| Sterne 34F2                    | WT                               | Wild-type (pXO1 <sup>+</sup> pXO2 <sup>-</sup> )                                                 | (1)           |
| $\Delta$ <i>lcpB1</i>          | <i>lcpB1</i>                     | Deletion of <i>lcpB1</i> ( <i>bas1830</i> ) nucleotides 1856993-1857982 in 34F2                  | This work     |
| <i>lcpB2::apha3</i>            | <i>lcpB2</i>                     | <i>lcpB2</i> ( <i>bas0572</i> ):: <i>apha3</i> transposon insertion at nucleotide 619533 in 34F2 | This work     |
| $\Delta$ <i>lcpB3</i>          | <i>lcpB3</i>                     | Deletion of <i>lcpB3</i> ( <i>bas0746</i> ) nucleotides 798568-799746 in 34F2                    | This work     |
| $\Delta$ <i>lcpB4</i>          | <i>lcpB4</i>                     | Deletion of <i>lcpB4</i> ( <i>bas3381</i> ) nucleotides 3356447-3357475 in 34F2                  | This work     |
| $\Delta$ <i>lcpC</i>           | <i>lcpC</i>                      | Deletion of <i>lcpC</i> ( <i>bas5115</i> ) nucleotides 4995461-4994610 in 34F2                   | This work     |
| <i>lcpD::aad9</i>              | <i>lcpD</i>                      | <i>lcpD</i> ( <i>bas5047</i> ):: <i>aad9</i> transposon insertion at nucleotide 4919831 in 34F2  | This work     |
| $\Delta$ <i>sap</i>            | <i>sap</i>                       | Deletion of <i>sap</i> ( <i>bas0841</i> ) nucleotides 896758-899063 in 34F2                      | (2)           |
| $\Delta$ <i>eag</i>            | <i>eag</i>                       | Deletion of <i>eag</i> ( <i>bas0842</i> ) nucleotides 899843-902414 in 34F2                      | (2)           |
| <i>bslR::Sp</i>                | <i>bslR</i>                      | <i>bslR</i> ( <i>bas3463</i> )::Sp transposon insertion at nucleotide 3437623 in 34F2            | This work     |
| <i>bslU::Sp</i>                | <i>bslU</i>                      | <i>bslU</i> ( <i>bas2351</i> )::Sp transposon insertion at nucleotide 2351169 in 34F2            | This work     |
| <i>S. aureus</i>               |                                  |                                                                                                  |               |
| MSSA1112                       | WT ( <i>S. aureus</i> )          | Wild-type Methicillin sensitive <i>S. aureus</i> , clinical isolate                              | (3)           |
| $\Delta$ <i>lcp</i>            | $\Delta$ <i>lcp</i>              | MSSA1112 lacking all three <i>lcp</i> genes                                                      | (4)           |
| <b>Plasmids</b>                | <b>Designation in this study</b> | <b>Description</b>                                                                               |               |
| pGC2- <i>lcpA<sub>Sa</sub></i> | <i>plcpA<sub>Sa</sub></i>        | pGC2 (pT194-based) encoding <i>lcpA<sub>Sa</sub></i> ( <i>msrR</i> )                             | (4)           |
| pWWW412                        | vector                           | pEC194 derivative carrying the <i>hprK</i> promoter of <i>S. aureus</i> (Cm <sup>R</sup> )       | (5)           |
| pYC99                          | <i>plcpB2<sub>Ba</sub></i>       | pWWW412 encoding <i>lcpB2<sub>Ba</sub></i> ( <i>bas0572</i> )                                    | This work     |
| pYC105                         | <i>plcpB3<sub>Ba</sub></i>       | pWWW412 encoding <i>lcpB3<sub>Ba</sub></i> ( <i>bas0746</i> )                                    | This work     |
| pYC100                         | <i>plcpB1<sub>Ba</sub></i>       | pWWW412 encoding <i>lcpB1<sub>Ba</sub></i> ( <i>bas1830</i> )                                    | This work     |
| pYC103                         | <i>plcpB4<sub>Ba</sub></i>       | pWWW412 encoding <i>lcpB4<sub>Ba</sub></i> ( <i>bas3381</i> )                                    | This work     |
| pYC101                         | <i>plcpD<sub>Ba</sub></i>        | pWWW412 encoding <i>lcpD<sub>Ba</sub></i> ( <i>bas5047</i> )                                     | This work     |
| pYC102                         | <i>plcpC<sub>Ba</sub></i>        | pWWW412 encoding <i>lcpC<sub>Ba</sub></i> ( <i>bas5115</i> )                                     | This work     |

**Table S2. Primers used in this study**

| Name                   | Sequence <sup>1</sup>                  | Use                                              |
|------------------------|----------------------------------------|--------------------------------------------------|
| BAS0572 NdeI F         | NNcatatgAACAAAGATACTCGAGCC             | Expression of <i>lcpB2<sub>Ba</sub></i>          |
| BAS0572 BamHI R        | NNggatccTTATAATTTTTATGTTTCATTTTTATTTCG | Expression of <i>lcpB2<sub>Ba</sub></i>          |
| BAS0746 XhoI F         | NNctcgagCAAACCCATCTTTGCAAGAAAATAC      | Expression of <i>lcpB3<sub>Ba</sub></i>          |
| BAS0746 XhoI R         | NNctcgagTTATTCATTGTCGTTAGACGATG        | Expression of <i>lcpB3<sub>Ba</sub></i>          |
| BAS1820 NdeI F         | NNcatatgAGCTCTGAATTAGAACAAAATACGAG     | Expression of <i>lcpB1<sub>Ba</sub></i>          |
| BAS1830 BamHI R        | NNggatccTTATTCATTTGAACTGATTTGGTG       | Expression of <i>lcpB1<sub>Ba</sub></i>          |
| BAS3381 XhoI F         | NNctcgagAATCACTCTTCTTCAAGAGAAAGGAAA    | Expression of <i>lcpB4<sub>Ba</sub></i>          |
| BAS3381 XhoI R         | NNctcgagTCAATTTTCTCAATCTCCTTTTC        | Expression of <i>lcpB4<sub>Ba</sub></i>          |
| BAS5047 NdeI F         | NNcatatgGAAGAAGTTATTATCATCTCCAAA       | Expression of <i>lcpD<sub>Ba</sub></i>           |
| BAS5047 BamHI R        | NNggatccTTATTGCTGATTTCTCATAATCCACTC    | Expression of <i>lcpD<sub>Ba</sub></i>           |
| BAS5115 NdeI F         | NNcatatgAAAAAGAAAATTTATTTTGGGTAICTCGG  | Expression of <i>lcpC<sub>Ba</sub></i>           |
| BAS5115 BamHI R        | NNggatccTACTTAGTCACTTCAAGATGCGTTC      | Expression of <i>lcpC<sub>Ba</sub></i>           |
| BAS0746 1kb up EcoRI F | TTTgaattcATTGCTGCTATTATGATGTTTCGTAC    | Allelic replacement of <i>lcpB3<sub>Ba</sub></i> |
| BAS0746 1kb up XhoI R  | TTTctcgagAACGACAATGAATAATAAGAAGCAG     | Allelic replacement of <i>lcpB3<sub>Ba</sub></i> |
| BAS0746 1kb dn XhoI F  | TTTctcgagCATTTCTGTACTCCTTCATTTGG       | Allelic replacement of <i>lcpB3<sub>Ba</sub></i> |
| BAS0746 1kb dn XmaI R  | TTTccggGTTACACAACCACCTACTTTACC         | Allelic replacement of <i>lcpB3<sub>Ba</sub></i> |
| BAS1830 1kb up EcoRI F | TTTgaattcGTTTATTGATTGTGATGCAACAGGTG    | Allelic replacement of <i>lcpB1<sub>Ba</sub></i> |
| BAS1830 1kb up XhoI R  | TTTctcgagTCATAACCATTGCTCTCTTTCTC       | Allelic replacement of <i>lcpB1<sub>Ba</sub></i> |
| BAS1830 1kb dn XhoI F  | TTTctcgagATGAATAATAAAAAGATTGGCTTC      | Allelic replacement of <i>lcpB1<sub>Ba</sub></i> |
| BAS1830 1kb dn XmaI R  | TTTccgggCTTCATTAACATCTTACTTTCTAC       | Allelic replacement of <i>lcpB1<sub>Ba</sub></i> |
| BAS3381 1kp up EcoRI F | TTTgaattcGGATGATGAAAAATTATTTGATGAG     | Allelic replacement of <i>lcpB4<sub>Ba</sub></i> |
| BAS3381 1kp up XhoI R  | TTTctcgagAGTGATTCTCCATATAATTATCCC      | Allelic replacement of <i>lcpB4<sub>Ba</sub></i> |
| BAS3381 1kb dn XhoI F  | TTTctcgagGGCGAAATGTCTGCTTTTTATTATG     | Allelic replacement of <i>lcpB4<sub>Ba</sub></i> |
| BAS3381 1kb dn XmaI R  | TTTccgggAATACTGATTCTGATGATGATGTCC      | Allelic replacement of <i>lcpB4<sub>Ba</sub></i> |
| BAS5115 1kb up EcoRI F | AAAgattcTTAGCATTCTTCGAGGC              | Allelic replacement of <i>lcpC<sub>Ba</sub></i>  |
| BAS5115 1kb up NheI R  | AAAgctagCCGAGTACCCAAAATAAAATTTCTTTTC   | Allelic replacement of <i>lcpC<sub>Ba</sub></i>  |
| BAS5115 1kb dn NheI F  | AAAgctagCAAGAACGCATCTTGAAGTACTAA       | Allelic replacement of <i>lcpC<sub>Ba</sub></i>  |
| BAS5115 1kb dn XmaI R  | AAAccgggTAAACGTGCTGGATCTCCC            | Allelic replacement of <i>lcpC<sub>Ba</sub></i>  |

<sup>1</sup>NN refers to random nucleotides incorporated for optimal restriction activity.  
Restriction site sequence is denoted in lower-case.

## References

1. **Ravel J, Jiang L, Stanley ST, Wilson MR, Decker RS, Read TD, Worsham P, Keim PS, Salzberg SL, Fraser-Liggett CM, Rasko DA.** 2009. The complete genome sequence of *Bacillus anthracis* Ames "Ancestor". *J. Bacteriol.* **191**:445-446.

2. **Nguyen-Mau S-M, Oh SY, Kern V, Missiakas D, Schneewind O.** 2012. Secretion genes as determinants of *Bacillus anthracis* chain length. *J. Bacteriol.* **194**:3841-3850.
3. **Entenza JM, Vouillamoz J, Glauser MP, Moreillon P.** 1997. Levofloxacin versus ciprofloxacin, flucloxacillin, or vancomycin for treatment of experimental endocarditis due to methicillin-susceptible or -resistant *Staphylococcus aureus*. *Antimicrob. Agents Chemother.* **41**:1662-1667.
4. **Over B, Heusser R, McCallum N, Schulthess B, Kupferschmied P, Gaiani JM, Sifri CD, Berger-Bächi B, Stutzmann Meier P.** 2011. LytR-CpsA-Psr proteins in *Staphylococcus aureus* display partial functional redundancy and the deletion of all three severely impairs septum placement and cell separation. *FEMS Microbiol. Lett.* **320**:142-151.
5. **Bubeck Wardenburg J, Williams WA, Missiakas D.** 2006. Host defenses against *Staphylococcus aureus* infection require recognition of bacterial lipoproteins. *Proc. Nat. Acad. Sci. USA* **103**:13831-13836.
